# Supplementary material for: Dose-dependent effects of CeO2 nanomaterials on tomato plant chemistry and insect herbivore resistance
Source: Royal Society of Chemistry journal article supplement (doi:10.1039/d1en00837d), 2021-01-01
Supplement: d1en00837d1.pdf [file d1en00837d1.pdf]

## Supporting information

**Title: Dose-dependent effects of CeO<sub>2</sub> nanomaterials on tomato plant chemistry  
and insect herbivore resistance**

Zhengao Xiao <sup>a, b, c</sup>, Ningke Fan <sup>a, b, c</sup>, Le Yue <sup>a, b, c</sup>, Feiran Chen <sup>a, b, c</sup>, Haihua Ji <sup>a, b, c</sup>,  
Yinghua Shu <sup>d</sup>, Sergio Rasmann <sup>e</sup>, and Zhenyu Wang <sup>a, b, c\*</sup>

<sup>a</sup> Institute of Environmental Processes and Pollution Control, and School of Environmental and Civil Engineering, Jiangnan University, Wuxi 214122, China

<sup>b</sup> Jiangsu Engineering Laboratory for Biomass Energy and Carbon Reduction Technology, Jiangnan University, Wuxi 214122, China

<sup>c</sup> Jiangsu Key Laboratory of Anaerobic Biotechnology, Jiangnan University, Wuxi 214122, China

<sup>d</sup> Department of Ecology, College of Natural Resources and Environment, South China Agricultural University, Guangzhou 510642, China

<sup>e</sup> Institute of Biology, University of Neuchâtel, Neuchâtel 2000, Switzerland

\*Corresponding author: Dr. Zhenyu Wang

E-mail address: wang0628@jiangnan.edu.cn

**Table S1.** Correlation table between root morphology traits and plant (shoot, root and total) biomass. Shown are coefficient of correlations and p values based on Pearson's correlation analyses.

| <b>Root morphology traits</b> | <b>Shoot biomass</b> | <b>Root biomass</b> | <b>Total biomass</b> |
|-------------------------------|----------------------|---------------------|----------------------|
| Root length                   | r = 0.33, p = 0.160  | r = 0.52, p = 0.019 | r = 0.44, p = 0.049  |
| Root surface area             | r = 0.59, p = 0.005  | r = 0.63, p = 0.003 | r = 0.69, p < 0.001  |
| Root tips                     | r = 0.48, p = 0.033  | r = 0.39, p = 0.089 | r = 0.51, p = 0.019  |
| Root volume                   | r = 0.73, p < 0.001  | r = 0.66, p = 0.002 | r = 0.82, p < 0.001  |

**Table S2.** Two-way ANOVA table for determining the interactive effects of CeO<sub>2</sub> treatment and herbivore *Helicoverpa armigera* on tomato plant growth, nutrient and chemical defense traits. The results are shown with the test statistic F-value and significance levels (\*\**p* < 0.001, \*\**p* < 0.01, \**p* < 0.05 and <sup>NS</sup> *p* > 0.05).

| Plant traits         | CeO <sub>2</sub> treatment | Herbivore          | CeO <sub>2</sub> treatment × Herbivore |
|----------------------|----------------------------|--------------------|----------------------------------------|
| Shoot biomass        | 3.90 *                     | 1.34 <sup>NS</sup> | 0.15 <sup>NS</sup>                     |
| Root biomass         | 2.24 <sup>NS</sup>         | 3.94 <sup>NS</sup> | 0.70 <sup>NS</sup>                     |
| Shoot height         | 5.64 **                    | 0.31 <sup>NS</sup> | 0.51 <sup>NS</sup>                     |
| Stem thickness       | 0.67 <sup>NS</sup>         | 2.47 <sup>NS</sup> | 0.20 <sup>NS</sup>                     |
| Leaf chlorophyll     | 7.37 ***                   | 11.21 **           | 1.87 <sup>NS</sup>                     |
| Root length          | 2.58 <sup>NS</sup>         | 0.57 <sup>NS</sup> | 0.62 <sup>NS</sup>                     |
| Root surface area    | 5.82 **                    | 1.78 <sup>NS</sup> | 0.39 <sup>NS</sup>                     |
| Root volume          | 5.87 **                    | 0.65 <sup>NS</sup> | 0.92 <sup>NS</sup>                     |
| Root tips            | 8.26 ***                   | 9.84 **            | 2.68 <sup>NS</sup>                     |
| Leaf Ce              | 3.20 *                     | 7.31 *             | 0.92 <sup>NS</sup>                     |
| Root Ce              | 13.78 ***                  | 0.92 <sup>NS</sup> | 0.93 <sup>NS</sup>                     |
| Leaf C               | 3.97 *                     | 0.04 <sup>NS</sup> | 2.59 <sup>NS</sup>                     |
| Leaf N               | 3.57 *                     | 17.31 ***          | 1.90 <sup>NS</sup>                     |
| Leaf Fe              | 9.21 ***                   | 0.26 <sup>NS</sup> | 8.21 ***                               |
| Leaf Mn              | 3.18 *                     | 0.20 <sup>NS</sup> | 1.54 <sup>NS</sup>                     |
| Leaf Cu              | 1.94 <sup>NS</sup>         | 4.79 *             | 2.24 <sup>NS</sup>                     |
| Leaf Si              | 5.46 *                     | 0.11 <sup>NS</sup> | 1.33 <sup>NS</sup>                     |
| Leaf soluble sugars  | 18.53 ***                  | 3.56 <sup>NS</sup> | 0.07 <sup>NS</sup>                     |
| Leaf amino acids     | 70.38 ***                  | 2.58 <sup>NS</sup> | 0.11 <sup>NS</sup>                     |
| Leaf total phenolics | 11.45 ***                  | 0.24 <sup>NS</sup> | 0.46 <sup>NS</sup>                     |
| Leaf flavonoids      | 12.63 ***                  | 0.62 <sup>NS</sup> | 0.28 <sup>NS</sup>                     |

**Table S3.** Correlation table for assessing the relationship between plant chemical traits and larva weight gain of *Helicoverpa armigera*. Shown are coefficient of correlations and p values based on Pearson's correlation analyses.

| <b>Plant chemical traits</b> | <b>Larva weight gain of <i>H. armigera</i></b> |
|------------------------------|------------------------------------------------|
| Leaf Ce                      | r = 0.17, p = 0.483                            |
| Leaf C                       | r = 0.001, p = 0.997                           |
| Leaf N                       | r = 0.025, p = 0.279                           |
| Leaf Fe                      | r = -0.35, p = 0.127                           |
| <b>Leaf Mn</b>               | <b>r = -0.48, p = 0.033</b>                    |
| Leaf Cu                      | r = -0.28, p = 0.226                           |
| <b>Leaf Si</b>               | <b>r = -0.47, p = 0.035</b>                    |
| Leaf soluble sugars          | r = 0.10, p = 0.657                            |
| Leaf amino acids             | r = 0.27, p = 0.238                            |
| <b>Leaf phenolics</b>        | <b>r = -0.76, p &lt; 0.001</b>                 |
| Leaf flavonoids              | r = -0.07, p = 0.769                           |

**Figure S1**

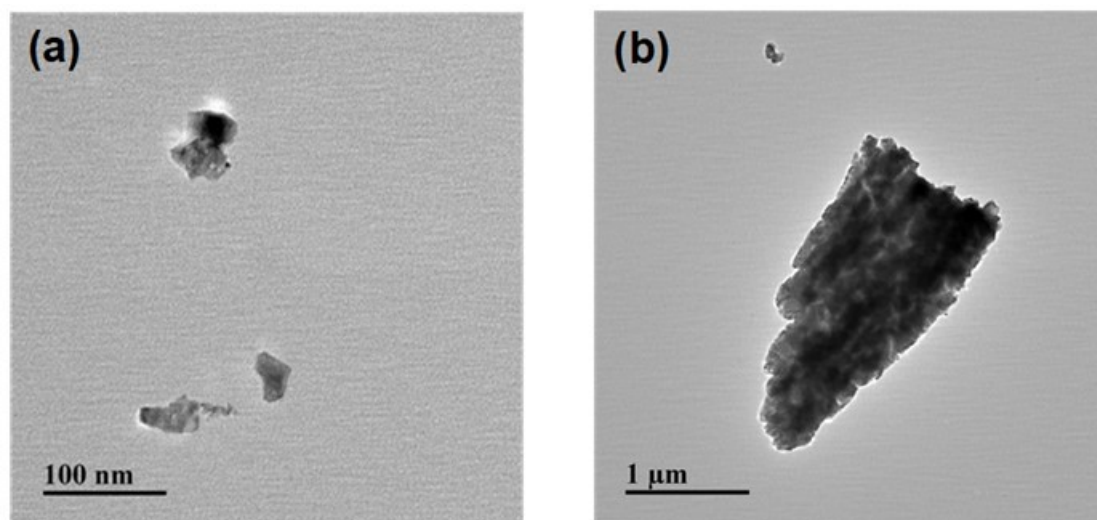

**Fig. S1.** Characterization of CeO<sub>2</sub> NMs and CeO<sub>2</sub> bulk materials (BMs) suspended in Milli-Q water. TEM images show the size and shape of CeO<sub>2</sub> NMs (a) and CeO<sub>2</sub> BMs (b), respectively.
